# Supplementary material
Source: PubMed Central journal article supplement (PMC5129876)
Supplement: cr201647x1.pdf [file cr201647x1.pdf]

**Figure S1**

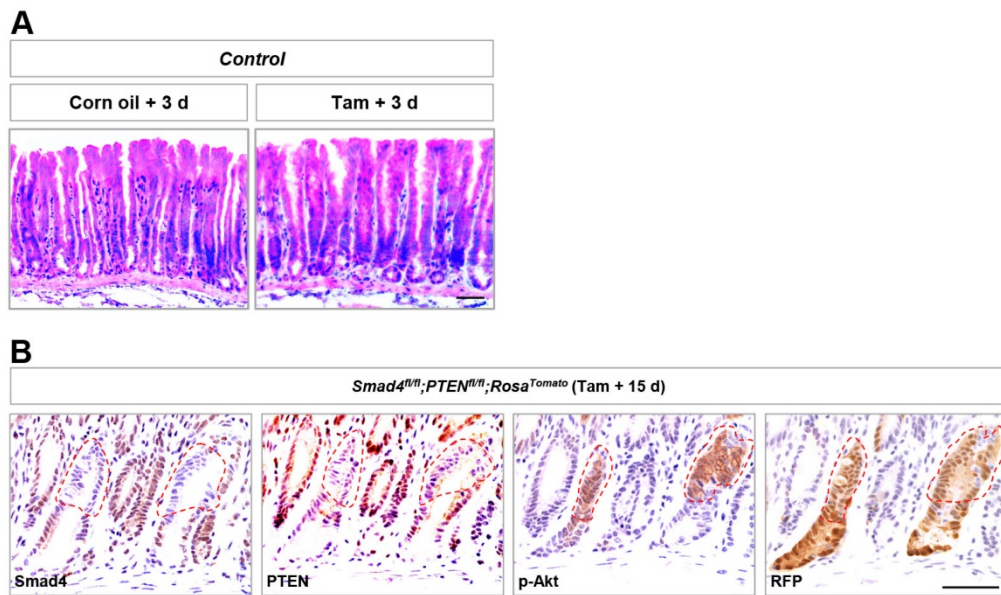

**Figure S1** *Smad4* and *PTEN* were efficiently deleted in the progenies of *Lgr5*<sup>+</sup> stem cells at gastric antrum. (A) Tamoxifen treatment did not cause morphological aberration in the gastric antral epithelium. H&E analysis of *Lgr5-Cre<sup>ERT2</sup>;Smad4<sup>fl/+</sup>;PTEN<sup>fl/+</sup>* antrum at 3 days after 6 consecutive administration of tamoxifen (Tam) or corn oil. (B) Immunohistochemical (IHC) analysis of Smad4, PTEN, p-Akt and RFP (specific for Tomato) on consecutive sections from *Lgr5-Cre<sup>ERT2</sup>;Smad4<sup>fl/fl</sup>;PTEN<sup>fl/fl</sup>;Rosa<sup>Tomato</sup>* (hereafter *Smad4<sup>fl/fl</sup>;PTEN<sup>fl/fl</sup>;Rosa<sup>Tomato</sup>*) antrum at 15 days after tamoxifen administration. The cluster characteristics of Smad4-negative, PTEN-negative, p-Akt-positive and RFP-positive were readily observed throughout the antrum (red dotted areas). Scale bars: 50  $\mu$ m.
