# Supplementary material
Source: PubMed Central journal article supplement (PMC5129876)
Supplement: cr201647x3.pdf [file cr201647x3.pdf]

**Figure S3**

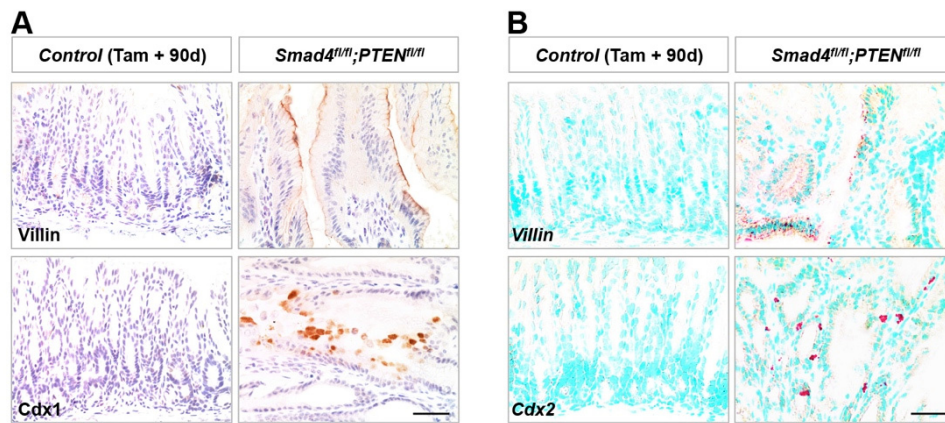

**Figure S3** Gastric antral adenoma in *Smad4* and *PTEN* mutant mice ectopically expressed intestinal epithelial markers. (A) IHC analysis of Villin and Cdx1 in *Control* antral epithelium as well as *Smad4* and *PTEN* double mutant adenoma at 90 days post-induction. (B) ISH analysis of *Villin* and *Cdx2* mRNA expression in *Control* antral epithelium and double mutant adenoma at 90 days post-induction. Scale bar: 50  $\mu$ m.
