# Supplementary material
Source: PubMed Central journal article supplement (PMC5129876)
Supplement: cr201647x5.pdf [file cr201647x5.pdf]

Figure S5

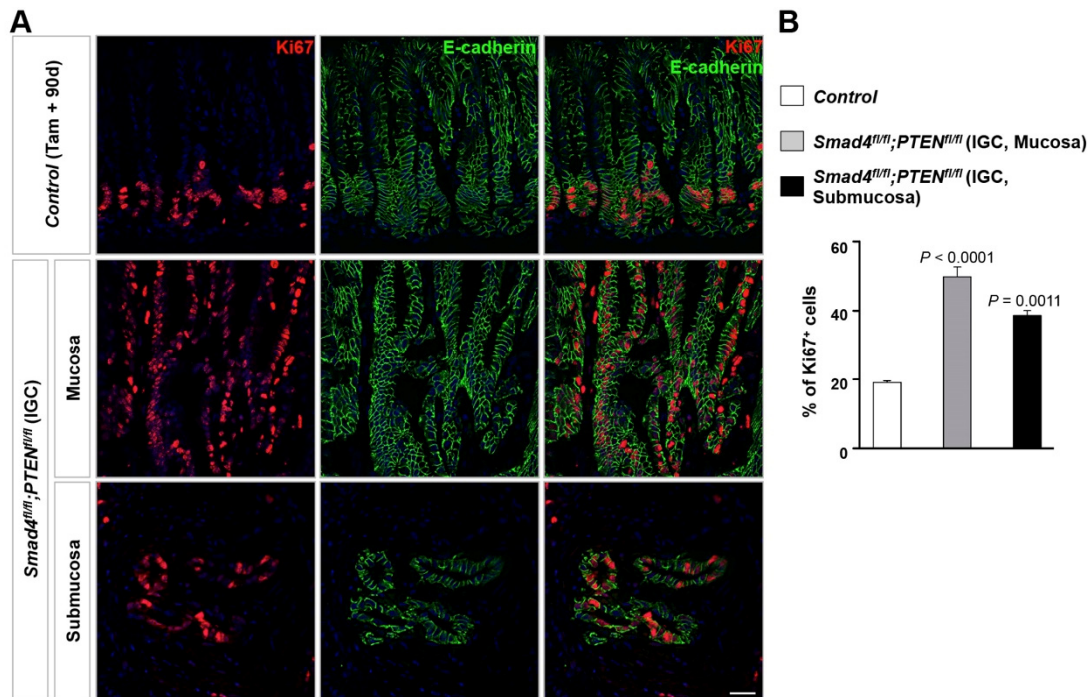

**Figure S5** Active proliferation in IGC of *Smad4* and *PTEN* compound mutant mice. (A) Double immunostaining of Ki67 and E-cadherin in *Control* antral epithelium, the mucosal and submucosal lesions of IGC from *Smad4* and *PTEN* compound mutant mice at 90 days post-induction. (B) Quantification of the percentage of proliferative Ki67<sup>+</sup> cells in E-cadherin<sup>+</sup> epithelial cells in *Control* gastric antrum and IGC. Significance was calculated using Student's t test (n = 4). Scale bars: 25  $\mu$ m.
