# Supplementary material
Source: PubMed Central journal article supplement (PMC5129876)
Supplement: cr201647x6.pdf [file cr201647x6.pdf]

**Figure S6**

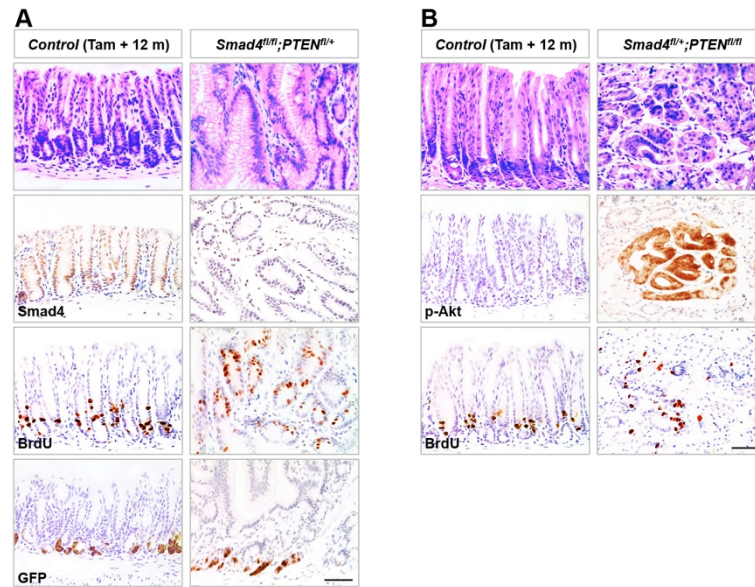

**Figure S6** Gastric tumor formation in *Smad4* or *PTEN* single mutant mice. (A) H&E and IHC analysis of Smad4 and BrdU in the *Lgr5-Cre<sup>ERT2</sup>;Smad4<sup>fl/fl</sup>;PTEN<sup>fl/+</sup>* antrum at 12 months post-induction. Compared with *Control* mice, adenoma lacking *Smad4* showed the increased proliferation. (B) H&E and IHC analysis of p-Akt and BrdU in the *Lgr5-Cre<sup>ERT2</sup>;Smad4<sup>fl/+</sup>;PTEN<sup>fl/fl</sup>* antrum at 12 months post-induction. Microadenoma visualized by p-Akt staining was observed. Scale bar: 50  $\mu$ m.
