# Supplementary material
Source: PubMed Central journal article supplement (PMC5129876)
Supplement: cr201647x7.pdf [file cr201647x7.pdf]

**Figure S7**

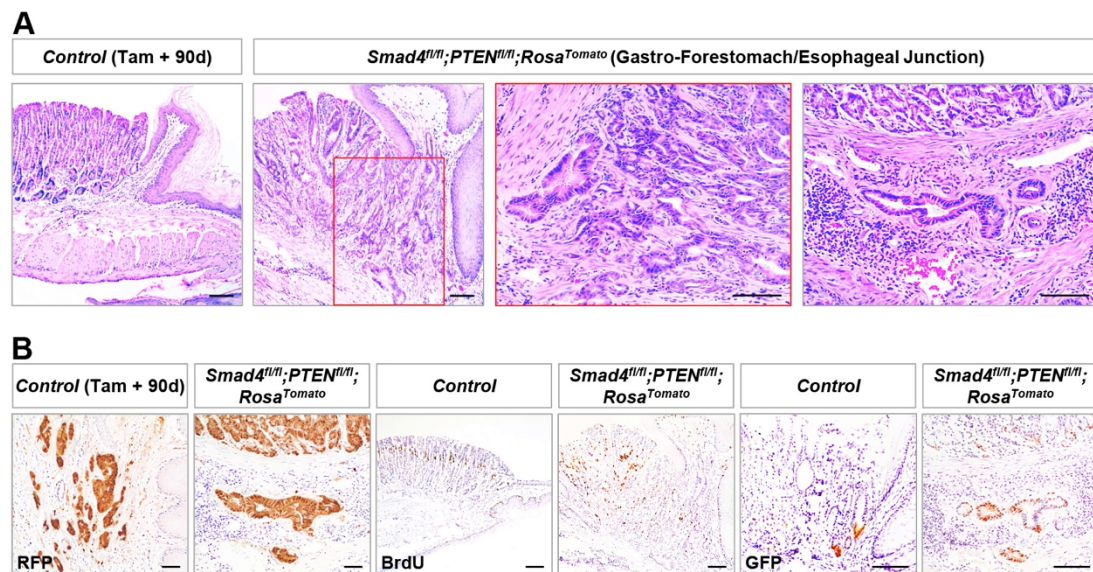

**Figure S7** Invasive IGC at the gastro-forestomach/esophageal junction of *Smad4* and *PTEN* double mutant stomach. **(A)** Invasive IGC developed at the gastro-forestomach/esophageal junction of double mutant mice. The red solid-line boxes were magnified on the right. **(B)** IHC analysis of RFP, BrdU and GFP in the invasive IGC at the gastro-forestomach/esophageal junction of double mutant mice. Scale bar: 100  $\mu$ m.
