# Supplementary material
Source: PubMed Central journal article supplement (PMC5129876)
Supplement: cr201647x9.pdf [file cr201647x9.pdf]

**Figure S9**

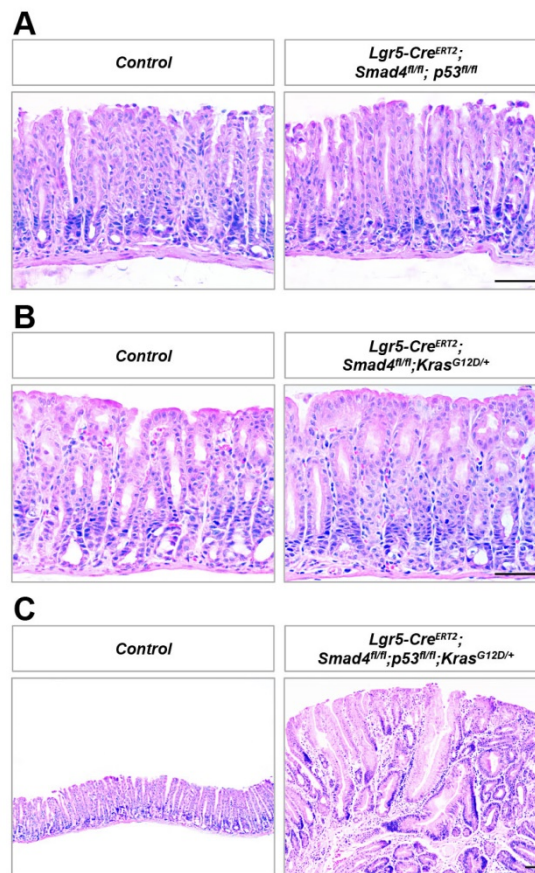

**Figure S9** Smad4 deletion with combination of p53 deletion and/or  $Kras^{G12D}$  expression in gastric  $Lgr5^+$  stem cells led to tumor formation. (A) H&E staining of the gastric antrum from Control (*Lgr5-Cre;Smad4<sup>fl/fl</sup>;p53<sup>fl/fl</sup>*) and *Smad4* and *p53* double mutant mice (*Lgr5-Cre;Smad4<sup>fl/fl</sup>;p53<sup>fl/fl</sup>*) at 4 months after six daily administrations of 2mg tamoxifen. (B) H&E staining of the gastric antrum from Control (*Lgr5-Cre;Smad4<sup>fl/fl</sup>;Kras<sup>+/+</sup>*) and *Smad4* deletion with combination of  $Kras^{G12D}$  expression mice (*Lgr5-Cre;Smad4<sup>fl/fl</sup>;Kras<sup>G12D/+</sup>*) at 4 months after a single induction. (C) H&E staining of the gastric antrum from Control (*Lgr5-Cre;Smad4<sup>fl/fl</sup>;p53<sup>fl/fl</sup>;Kras<sup>+/+</sup>*) and triple mutant mice (*Lgr5-Cre;Smad4<sup>fl/fl</sup>;p53<sup>fl/fl</sup>;Kras<sup>G12D/+</sup>*) at 4 months after a single induction. Scale bars: 50  $\mu$ m.
