# Supplementary material
Source: PubMed Central journal article supplement (PMC5129876)
Supplement: cr201647x11.pdf [file cr201647x11.pdf]

**Table S1** A correlation between *SMAD4* gene deletion and human gastric cancer subtypes occurring at the antrum and gastro-esophageal junction (GEJ)

|       |   | Intestinal | Diffuse | P-value  |
|-------|---|------------|---------|----------|
| SMAD4 | - | 61         | 11      | 0.0007** |
|       | + | 48         | 32      |          |

\*\*P < 0.01,  $\chi^2$  test.

-, deep or shallow deletion; +, no deletion.
