# Supplementary material
Source: PubMed Central journal article supplement (PMC5129876)
Supplement: cr201647x12.pdf [file cr201647x12.pdf]

**Table S2** A correlation between *PTEN* gene deletion and human gastric cancer subtypes occurring at the antrum and GEJ

|             |   | Intestinal | Diffuse | <i>P</i> -value |
|-------------|---|------------|---------|-----------------|
| <i>PTEN</i> | - | 30         | 5       | 0.036*          |
|             | + | 79         | 38      |                 |

\* $P < 0.05$ ,  $\chi^2$  test.

-, deep or shallow deletion; +, no deletion.
