# Supplementary material
Source: PubMed Central journal article supplement (PMC5129876)
Supplement: cr201647x13.pdf [file cr201647x13.pdf]

**Table S3** *SMAD4* gene deletion relative to protein expression in human intestinal-type gastric cancers occurring at the antrum and GEJ

|                    |   | Gene Deletion |    |    | P-value  |
|--------------------|---|---------------|----|----|----------|
|                    |   | -2            | -1 | 0  |          |
| Protein Expression | + | 2             | 17 | 24 | 0.0045** |
|                    | - | 7             | 24 | 9  |          |

\*\* $P < 0.01$ , Fisher exact test.

-2, deep deletion; -1, shallow deletion; 0, neutral.

+, high expression; -, low expression.
