# Supplementary material
Source: PubMed Central journal article supplement (PMC5129876)
Supplement: cr201647x14.pdf [file cr201647x14.pdf]

**Table S4** *PTEN* gene deletion relative to protein expression in human intestinal-type gastric cancers occurring at the antrum and GEJ

|                    |   | Gene Deletion |    |    | P-value |
|--------------------|---|---------------|----|----|---------|
|                    |   | -2            | -1 | 0  |         |
| Protein Expression | + | 0             | 8  | 33 | 0.0164* |
|                    | - | 2             | 16 | 20 |         |

\*P < 0.05, Fisher exact test.  
-2, deep deletion; -1, shallow deletion; 0, neutral.  
+, high expression; -, low expression.
