# Supplementary material
Source: PubMed Central journal article supplement (PMC5129876)
Supplement: cr201647x15.pdf [file cr201647x15.pdf]

**Table S5** A correlation in the gene deletion between *SMAD4* and *PTEN* in human intestinal-type gastric cancers occurring at the antrum and gastro-esophageal junction (GEJ)

|      |   | SMAD4 |    | P-value    |
|------|---|-------|----|------------|
|      |   | -     | +  |            |
| PTEN | - | 26    | 4  | < 0.0001** |
|      | + | 35    | 44 |            |

\*\* $P < 0.01$ ,  $\chi^2$  test.  
 -, deep or shallow deletion; +, no deletion.
