# Supplementary material
Source: PubMed Central journal article supplement (PMC5129876)
Supplement: cr201647x16.pdf [file cr201647x16.pdf]

**Table S6** SMAD4 protein expression relative to cyclin D1 in human intestinal-type gastric cancers occurring at the antrum and GEJ

|           |   | SMAD4 |    | P-value  |
|-----------|---|-------|----|----------|
|           |   | +     | -  |          |
| cyclin D1 | + | 13    | 26 | 0.0003** |
|           | - | 37    | 15 |          |

\*\* $P < 0.01$ ,  $\chi^2$  test. +, high expression; -, low expression.
