# Supplementary material
Source: PubMed Central journal article supplement (PMC5129876)
Supplement: cr201647x17.pdf [file cr201647x17.pdf]

**Table S7** PTEN protein expression relative to p-Akt<sup>T308</sup> in human intestinal-type gastric cancers occurring at the antrum and GEJ

|                       | PTEN |    | <i>P</i> -value |          |
|-----------------------|------|----|-----------------|----------|
|                       | +    | -  |                 |          |
| p-Akt <sup>T308</sup> | +    | 12 | 29              | 0.0001** |
|                       | -    | 35 | 15              |          |

\*\**P* < 0.01,  $\chi^2$  test. +, high expression; -, low expression.
